# Supplementary material
Source: bioRxiv or medRxiv preprint supplement (https://www.medrxiv.org/highwire/filestream/87578/field_highwire_adjunct_files/0/2020.06.26.20141325-1.pdf)

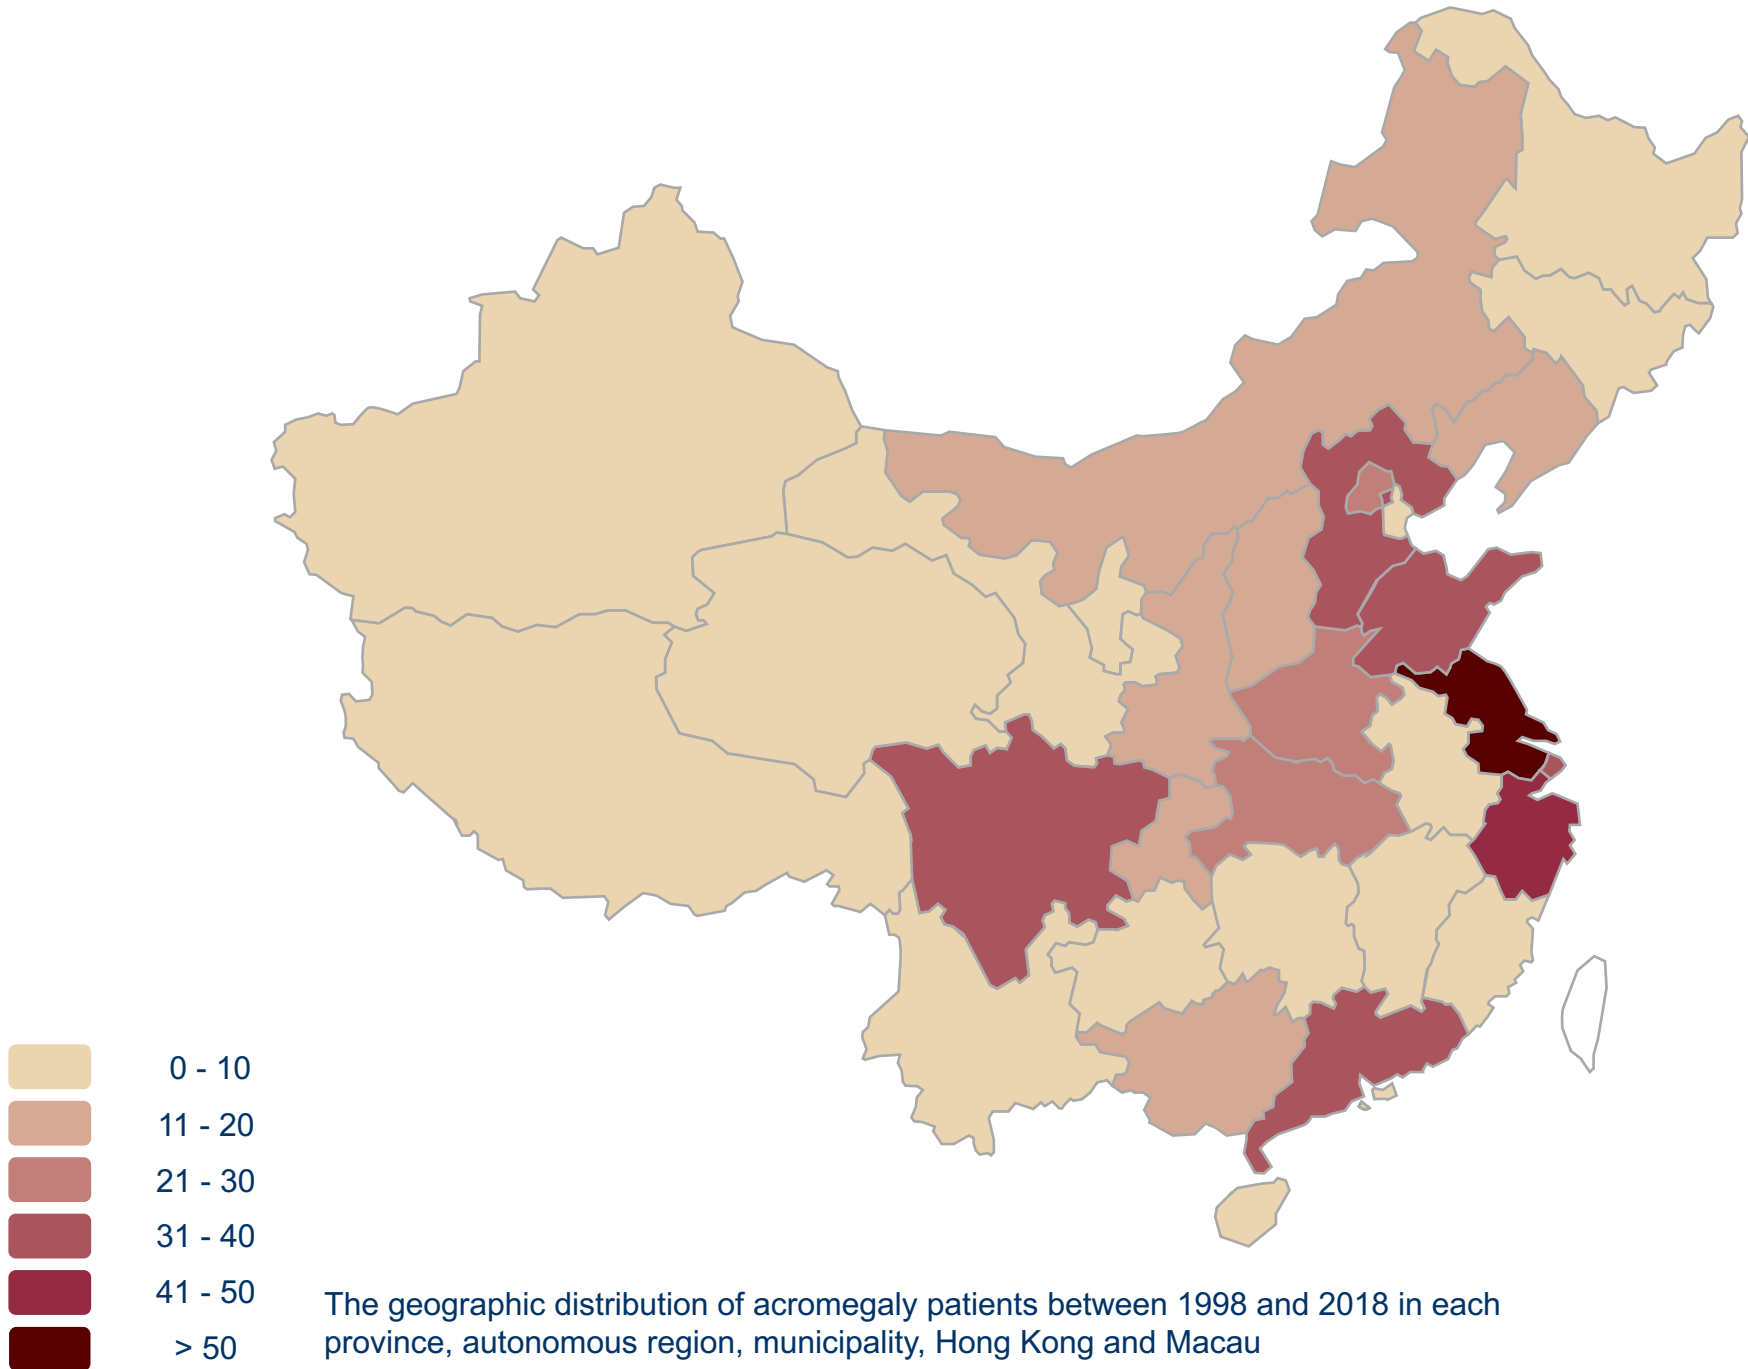

Supplement: Supplementary file [file 2020.06.26.20141325-1.pdf]
